# Supplementary material for: Enabling Factors, Barriers, and Perceptions of Pneumococcal Vaccination Strategy Implementation: A Qualitative Study
Source: MDPI journal article supplement (doi:10.3390/vaccines10071164), 2022-07-21
Supplement: s1 [file s1]

## **Supplementary materials**

**Supplementary material S1 Interview guide of doctors and services providers**

**Supplementary material S2 Interview guide of vaccine recipients**

**Supplementary material S3 Consolidated Framework for Implementation Research  
(CFIR)**

**Supplementary material S4 RE-AIM (Reach, Effectiveness, Adoption,  
Implementation,  
Maintenance) Framework**

**Supplementary table S1 Number of codes by theme among service  
providers**  
**Supplementary table S2 Number of codes by theme among  
patients**

## **Supplementary material S1. Interview guide of doctors and services providers**

1. Observations from service providers
  - a. As a service provider of the vaccination scheme, what do you think about the arrangements of the scheme? What difficulties have you encountered?
  - b. Before joining this programme, have you ever provided vaccination service? In your experience, are there any recommended practices for vaccination?
  - c. Does participating in this program increase your workload by a lot? Do you think the consultation time provided for the participants is sufficient?
2. Observations regarding the general public
  - a. In your opinion, how much do citizens aged over 65 value and know about vaccination?
  - b. Do you think the government's work in promotion of this vaccination scheme and recruitment of participants is sufficient? Do you have any other suggestions?
3. Observations regarding participants
  - a. What obstacles and difficulties do you think the participants have when participating in this vaccination programme?
  - b. Is the participants' compliance good after participating in the vaccination scheme? Do you have any suggestions for improvement?
  - c. During the whole process, what do you most hope participants can collaborate in doing?
  - d. Do you think this plan benefits the health of the participants?
  - e. How satisfied are the participants with the vaccination scheme? Did they provide any feedback to the doctor?
  - f. Do you think the participants and doctors trust each other? Is there any problem with communication?
4. Observations regarding the vaccine plan
  - a. Do you think the procedures in the vaccination scheme, such as inspection, consultation, participant education, and e.t.c., are appropriate? Is there any suggestions for improvement?
  - b. Overall, are you satisfied with the current vaccination scheme? Is this plan effective, convenient and feasible?
  - c. Would you recommend this vaccination scheme to your patients (who have not participated yet)?
  - d. In your opinion, in terms of epidemic prevention, what other practical approaches can the government adopt in addition to vaccination?
5. Recommendations of Government Vaccination Programme (GVP) or Vaccination Subsidy Scheme (VSS)
  - a. Would you recommend this programme to your family and friends?

## **Supplementary material S2. Interview guide of patients**

1. Awareness of vaccination as a means of prevention for Pneumococcal infection
  - a. Is it your first time receiving Pneumococcal vaccination?
    - i. If yes, is there any reason for not receiving Pneumococcal vaccination before?
    - ii. If no, why did you receive Pneumococcal vaccination before?
  - b. Did you notice any promotion of Government Vaccination Programme (GVP) or Vaccination Subsidy Scheme (VSS) from the Government?
    - i. If yes, can you list any channels?
  - c. Do you have any suggestions to improve the promotion of Government Vaccination Programme (GVP) or Vaccination Subsidy Scheme (VSS)?
2. Knowledge about pneumococcus and the pneumococcal vaccination
  - a. What do you know about pneumococcus?
    - i. What are the ways to prevent Pneumococcal infection?
  - b. What is pneumococcal vaccination?
    - i. Who should receive pneumococcal vaccination?
    - ii. What are the risk factors of Pneumococcal infection?
    - iii. What do you think your risk of acquiring Pneumococcal infection is?
    - iv. Why do you think your risk is high/ average?
3. Attitude and perception towards pneumococcal vaccination
  - a. How would you describe your attitude towards pneumococcal vaccination programme in general?
  - b. What motivated you to enrol in Government Vaccination Programme (GVP) or Vaccination Subsidy Scheme (VSS)?
  - c. Did you encounter any barriers when enrolling in the programme?
  - d. What are the difficulties you experienced when going through the Government Vaccination Programme (GVP) or Vaccination Subsidy Scheme (VSS)?
  - e. What are some positive points and do you have any suggestions for improvement?
4. Satisfaction of Government Vaccination Programme (GVP) or Vaccination Subsidy Scheme (VSS)?
  - a. Can you share with us your experience of going through the vaccination process? Any particular feelings and comments?
    - i. Were the arrangements of Government Vaccination Programme (GVP) or Vaccination Subsidy Scheme (VSS) clearly explained to you by clinic doctor or their staff?
    - ii. Were the details of the processes involved in Government Vaccination Programme (GVP) or Vaccination Subsidy Scheme (VSS) clearly explained to you by clinic doctor or their staff?
    - iii. Can you list a few instructions given by clinic doctor or their staff about pneumococcal vaccination?

- b. (If applicable) Has the doctor clearly explained the details and risks of the entire pneumococcal vaccination procedure?
    - i. Could you recall the risks of pneumococcal vaccination which were told by clinical doctor or their staff?
    - ii. Do you have any suggestions to improve the pneumococcal vaccination arrangement?
  - c. Did you read carefully the programme materials such as guidelines, leaflets and posters? Do you have any suggestions?
    - i. Are they clear, practical and easy to be understood?
5. Practice in Government Vaccination Programme (GVP) or Vaccination Subsidy Scheme (VSS)
- a. Would you recommend this programme to your family and friends?

## **Supplementary material S3. Consolidated Framework for Implementation Research (CFIR)**

### **Dimension 1: Characteristics of the intervention[20-24]**

#### *Construct 1: Intervention source*

Perception of key stakeholders about whether the vaccination programmes are externally or internally developed (by interviews of policy-makers)

#### *Construct 2: Evidence strength and quality*

Indicator: Evidence basis for GVP/VSS in enhancing pneumococcal vaccine uptake (i.e. why did policy makers believe such programmes are able to increase vaccine uptake; how did policy makers determine the amount of Government subsidy; what threshold level of quality did the programme consider as robust enough to adopt and translate into policy?) (by interviews of policy makers and review of programme documentations)

#### *Construct 3: Adaptability*

Indicator: The degree to which the GVP/VSS can be adapted, tailored, refined, or reinvented to meet patient needs in the population (by interviews of policy-makers and PCPs)

#### *Construct 4: Cost*

Indicator: The costs of formulation of the GVP/VSS and the costs associated with implementing the vaccine programmes, including investment, supply, and opportunity costs (by interviews of policymakers).

### **Dimension 2: Inner setting**

#### *Construct 1: Structural characteristics*

Indicator: 1) whether there are designated staff in the clinic who are in charge of providing pneumococcal vaccine (by interviews of the clinics-in-charge)

#### *Construct 2: Readiness for implementation*

Indicator: 1) whether there is sufficient staff to carry out the vaccine under GVP/VSS, 2) whether there is a protocol for screening patients and administering the vaccine under GVP/VSS, 3) whether there is sufficient storage of PCV (by interviews of the clinic-in-charge)

### **Dimension 3: Outer setting**

#### *Construct 1: Patients needs and resources*

Indicator: 1) whether Primary Care Practitioners (PCPs) in designated public clinics are aware of patients' concerns and barriers for taking up the vaccine (in-depth interview of the PCPs)

#### **Dimension 4: Individual involved**

*Construct 1: Knowledge and beliefs about the intervention*

Indicator: 1) PCPs in designated public clinics are aware of the GVP/VSS for pneumococcal vaccines; 2) belief (perceived benefits and barriers for implementing GVP/VSS) (in-depth interview of the PCPs)

*Construct 2: Self-efficacy*

Indicator: 1) confidence of implementing GVP/VSS of pneumococcal vaccine in the population (in-depth interview of the PCPs)

*Construct 3: Individual stage of change (overlap with Adoption of the REAIM framework, please see below)*

#### **Dimension 5: Implementation process**

*Construct 1: Engaging appropriate individuals in the implementation*

Indicator: 1) What stakeholders did policy makers identify for implementing the vaccines and the rationale behind (by interviews of policy-makers)

*Construct 2: Reflecting and evaluating*

Indicator: 1) Whether policy-makers monitor the implementation of GVP/VSS (number of vaccine uptake each year, coverage of vaccines in the target population), and 2) whether policy makers make adjustment/refinement of GVP/VSS based on the monitoring results. (by interviews of policy-makers)

**Supplementary material S4. RE-AIM (Reach, Effectiveness, Adoption, Implementation, Maintenance) framework [20-24]**

**Dimension 1: Reach**

Meaning: number, proportion and representativeness of eligible elderly individuals who have participated in the GVP/VSS; IndicatorI: 1) Percentage of elderly who had heard of GVP/VSS for vaccination (by population-based survey), 2) Whether elderly individuals were aware of the arrangements of the GVP/VSS (cost, who can receive free vaccines, location for vaccination, procedure to make appointment for vaccination) (by population-based survey)

**Dimension 2: Effectiveness**

Meaning: intervention effect on targeted outcomes

Indicator: 1) uptake rate of vaccine (by population-based survey), 2) use of GVP/VSS to receive pneumococcal vaccine instead of elsewhere (by population-based survey)

**Dimension 3: Adoption**

Meaning: number, percentage and representativeness of participating service providers

Indicator: 1) Whether PCPs in designated public clinics have introduced the vaccine under GVP/VSS to eligible patients (by interviews of PCPs)

2) Whether PCPs in designated public clinics provide pneumococcal vaccines under GVP/VSS to eligible patients (by interviews of PCPs)

3) Any extra cost when pneumococcal vaccines are provided under VSS for PCPs (by interviews of PCPs)

**Dimension 4: Implementation**

Meaning: The extent to which the intervention was consistently implemented by service providers

Indicator: 1) The extent to which PCPs in designated public clinics follow the protocol of providing pneumococcal vaccines under the GVP/VSS (by interviews of PCPs, or make use of standard patients)

**Dimension 5: Maintenance**

Meaning: the extent to which an intervention becomes part of routine organizational practices

Indicator: 1) Whether providing pneumococcal vaccines under GVP/VSS is a part of routine service in private/designated public clinics (by interviews of clinic-in-charge)

**Supplementary table S1. Number of codes by theme among service providers**

| <b>Themes</b>                                                                    | <b>Coding no.</b> | <b>No. of codes</b> |
|----------------------------------------------------------------------------------|-------------------|---------------------|
| reason for not participating_specialist                                          | 1                 | 7                   |
| reason for not participating_workload                                            | 2                 | 5                   |
| the arrangements of the scheme                                                   | 3                 | 16                  |
| difficulties in providing vaccination service_no                                 | 4                 | 6                   |
| difficulties in providing vaccination service_spacing                            | 5                 | 7                   |
| difficulties in providing vaccination service_procedures                         | 6                 | 14                  |
| difficulties in providing vaccination service_criteria&subsidy                   | 7                 | 34                  |
| difficulties in providing vaccination service_identify necessity                 | 8                 | 1                   |
| difficulties in providing vaccination service_homosexuality                      | 9                 | 1                   |
| difficulties in providing vaccination service_record                             | 10                | 12                  |
| difficulties in providing vaccination service_supply of vaccine                  | 11                | 10                  |
| resources_manpower                                                               | 12                | 16                  |
| resources_financing (payment method, additional fee)                             | 13                | 9                   |
| resources_equipment (education materials, information for patient)               | 14                | 17                  |
| experience of providing vaccination service                                      | 15                | 34                  |
| recommended practices for vaccination                                            | 16                | 44                  |
| workload                                                                         | 17                | 26                  |
| consultation time provided for participants                                      | 18                | 36                  |
| value and knowledge of elderly about the vaccination (citizens who aged over 65) | 19                | 34                  |
| awareness of the public                                                          | 20                | 15                  |
| government's work_promotion                                                      | 21                | 103                 |
| government's work_recruitment of participants                                    | 22                | 9                   |
| government's work_policy-making                                                  | 23                | 11                  |
| difficulties of the participants_knowledge                                       | 24                | 32                  |
| difficulties of the participants_belief                                          | 25                | 7                   |
| difficulties of the participants_feelings                                        | 26                | 19                  |
| difficulties of the participants_decision making                                 | 27                | 5                   |
| difficulties of the participants_cost                                            | 28                | 10                  |
| difficulties of the participants_no                                              | 29                | 1                   |
| compliance of the participants                                                   | 30                | 44                  |
| collaboration of participants                                                    | 31                | 27                  |
| benefits of the participants' health                                             | 32                | 26                  |
| satisfaction of the participants                                                 | 33                | 23                  |
| feedback from the participants                                                   | 34                | 14                  |
| communication between doctors and participants                                   | 35                | 14                  |
| trust between doctors and participants                                           | 36                | 28                  |



|                                                       |    |    |
|-------------------------------------------------------|----|----|
| <b>procedures_eligibility checking</b>                | 37 | 37 |
| <b>procedures_consultation</b>                        | 38 | 2  |
| <b>procedures_education</b>                           | 39 | 12 |
| <b>procedures_suggestions for improvement</b>         | 40 | 31 |
| <b>overall satisficiation of the doctors</b>          | 41 | 25 |
| <b>satisficiation of the doctors_effective</b>        | 42 | 12 |
| <b>satisficiation of the doctors_convenient</b>       | 43 | 3  |
| <b>satisficiation of the doctors_feasible</b>         | 44 | 7  |
| <b>cannot continue</b>                                | 45 | 3  |
| <b>continue</b>                                       | 46 | 6  |
| <b>benefits of the doctor</b>                         | 47 | 1  |
| <b>communication among doctors</b>                    | 48 | 3  |
| <b>epidemic prevention_other practical approaches</b> | 49 | 30 |
| <b>recommend to the patients</b>                      | 50 | 30 |
| <b>recommend to family and friends</b>                | 51 | 25 |
| <b>eHealth_access to information</b>                  | 52 | 6  |
| <b>COVID19</b>                                        | 53 | 41 |

**Supplementary table S2. Number of codes by theme among patients**

| <b>Themes</b>                                                                     | <b>Coding<br/>no.</b> | <b>No. of codes</b> |
|-----------------------------------------------------------------------------------|-----------------------|---------------------|
| <b>received pneumococcal vaccination before</b>                                   | 1                     | 25                  |
| <b>reason for receiving pneumococcal vaccination before</b>                       | 2                     | 15                  |
| <b>not received pneumococcal vaccination before</b>                               | 3                     | 4                   |
| <b>reason for not receiving pneumococcal vaccination before</b>                   | 4                     | 12                  |
| <b>notification of government promotion on gvp/vss</b>                            | 5                     | 25                  |
| <b>channels of promotion</b>                                                      | 6                     | 51                  |
| <b>suggestions of government promotion</b>                                        | 7                     | 49                  |
| <b>knowledge about pneumococcus</b>                                               | 8                     | 10                  |
| <b>knowledge about pneumococcus_no</b>                                            | 9                     | 7                   |
| <b>ways to prevent pneumococcal infection</b>                                     | 10                    | 20                  |
| <b>knowledge about pneumococcal vaccination</b>                                   | 11                    | 7                   |
| <b>knowledge about pneumococcal vaccination_no</b>                                | 12                    | 7                   |
| <b>targets for pneumococcal vaccination</b>                                       | 13                    | 19                  |
| <b>risk factors of pneumococcal infection</b>                                     | 14                    | 21                  |
| <b>personal risk of acquiring pneumococcal infection</b>                          | 15                    | 19                  |
| <b>reason for the perception of personal risk</b>                                 | 16                    | 18                  |
| <b>attitude towards pneumococcal vaccination programme</b>                        | 17                    | 31                  |
| <b>attitude against pneumococcal vaccination programme</b>                        | 18                    | 7                   |
| <b>motivation to enroll in gvp/vss</b>                                            | 19                    | 23                  |
| <b>barriers when enrolling in the programme</b>                                   | 20                    | 16                  |
| <b>difficulties when participating in the programme</b>                           | 21                    | 27                  |
| <b>positive points/improvement</b>                                                | 22                    | 27                  |
| <b>personal experience/ satisfaction of going through the vaccination process</b> | 23                    | 10                  |
| <b>explanation of the programme arrangements by clinic doctor or their staff</b>  | 24                    | 17                  |
| <b>explanation of the programme processes by clinic doctor or their staff</b>     | 25                    | 9                   |
| <b>instructions given by clinic doctor or their staff</b>                         | 26                    | 12                  |
| <b>explanation of the details and risks of the vaccination</b>                    | 27                    | 21                  |
| <b>the risks of pneumococcal vaccination that have been explained by doctors</b>  | 28                    | 11                  |
| <b>improvement of the vaccination arrangement</b>                                 | 29                    | 21                  |
| <b>programme materials</b>                                                        | 30                    | 23                  |
| <b>improvement of the programme materials</b>                                     | 31                    | 10                  |
| <b>clear, practical and easy to be understood</b>                                 | 32                    | 8                   |
| <b>recommend to family and friends</b>                                            | 33                    | 26                  |
| <b>covid19</b>                                                                    | 34                    | 15                  |
| <b>flu vaccination</b>                                                            | 35                    | 15                  |
